# Supplementary material for: NF1 expression profiling in IDH-wildtype glioblastoma: genomic associations and survival outcomes
Source: PubMed Central journal article supplement (PMC11520828; doi:10.1186/s40478-024-01875-z), 2024-10-29

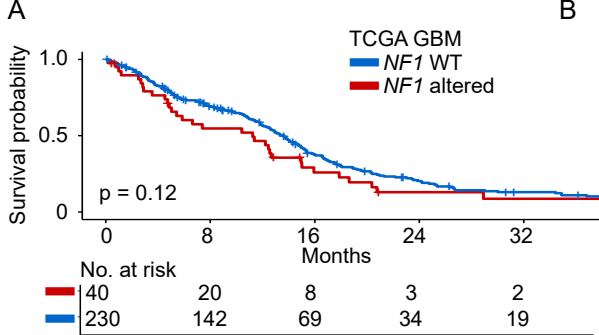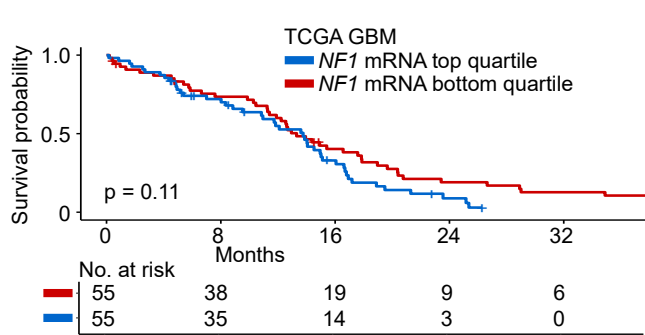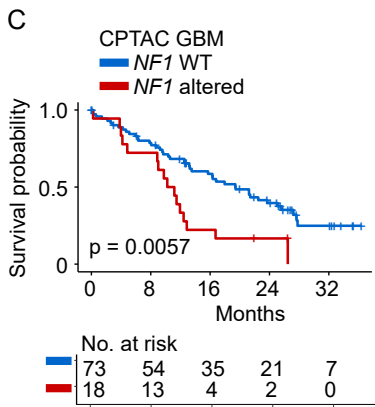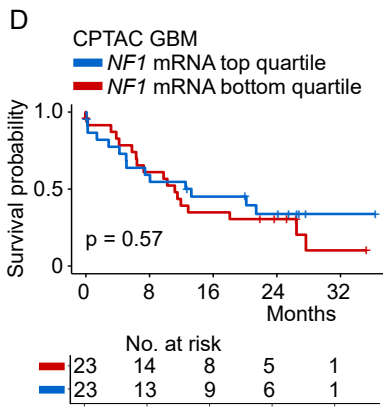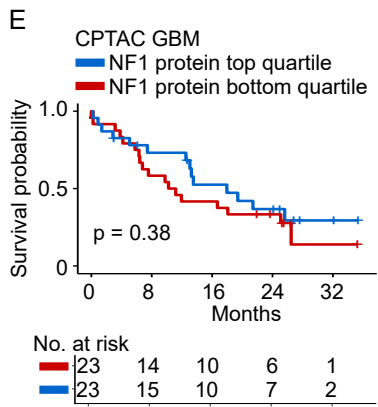

Supplement: 40478_2024_1875_MOESM2_ESM.pdf [file 40478_2024_1875_MOESM2_ESM.pdf]
