# Supplementary material for: NF1 expression profiling in IDH-wildtype glioblastoma: genomic associations and survival outcomes
Source: PubMed Central journal article supplement (PMC11520828; doi:10.1186/s40478-024-01875-z), 2024-10-29
Supplement: 40478_2024_1875_MOESM4_ESM.pdf [file 40478_2024_1875_MOESM4_ESM.pdf]

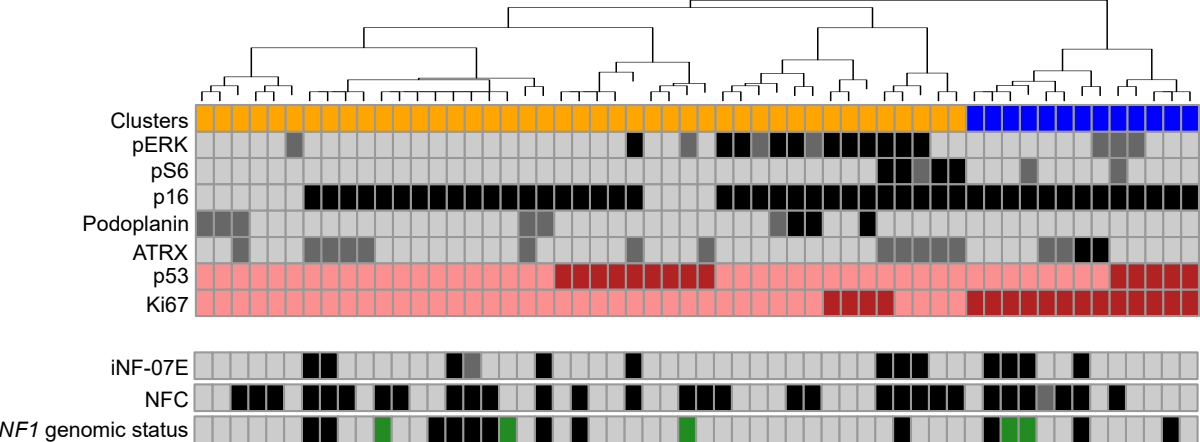

**Clusters**

- 1
- 2

**IHC**

- Minimal or absent
- Equivocal
- Immunoreactive

**NF1 genomic status**

- Lost
- VUS
- Intact

**p53/Ki67**

- High > 15% cells positive
- Low ≤ 15% cells positive
